# Supplementary material
Source: PubMed Central journal article supplement (PMC3584699)

*Supplementary Figure*

*Journal of Proteome Research*

**In-Source Fragmentation and the Sources of Partially Tryptic Peptides  
in Shotgun Proteomics**

Jong-Seo Kim, Matthew E. Monroe, David G. Camp II, Richard D. Smith, and Wei-Jun Qian\*

Biological Sciences Division and Environmental Molecular Sciences Laboratory, Pacific Northwest  
National Laboratory, Richland, WA 99352

**Supplementary Figure 1.** Summed full MS scan of AVVQDPALKPLALVYGEATSR in Figure 1A showing its most detectable y-ions (A). MS/MS spectrum of the same peptide for comparison (B). Extracted ion chromatograms of VAPEEHPVLLTEAPLNPK from actin, cytoplasmic 1 in mouse brain lysate as another example showing a series of in-source fragments; only y17 and y16 ions were identified by the data base search (C).

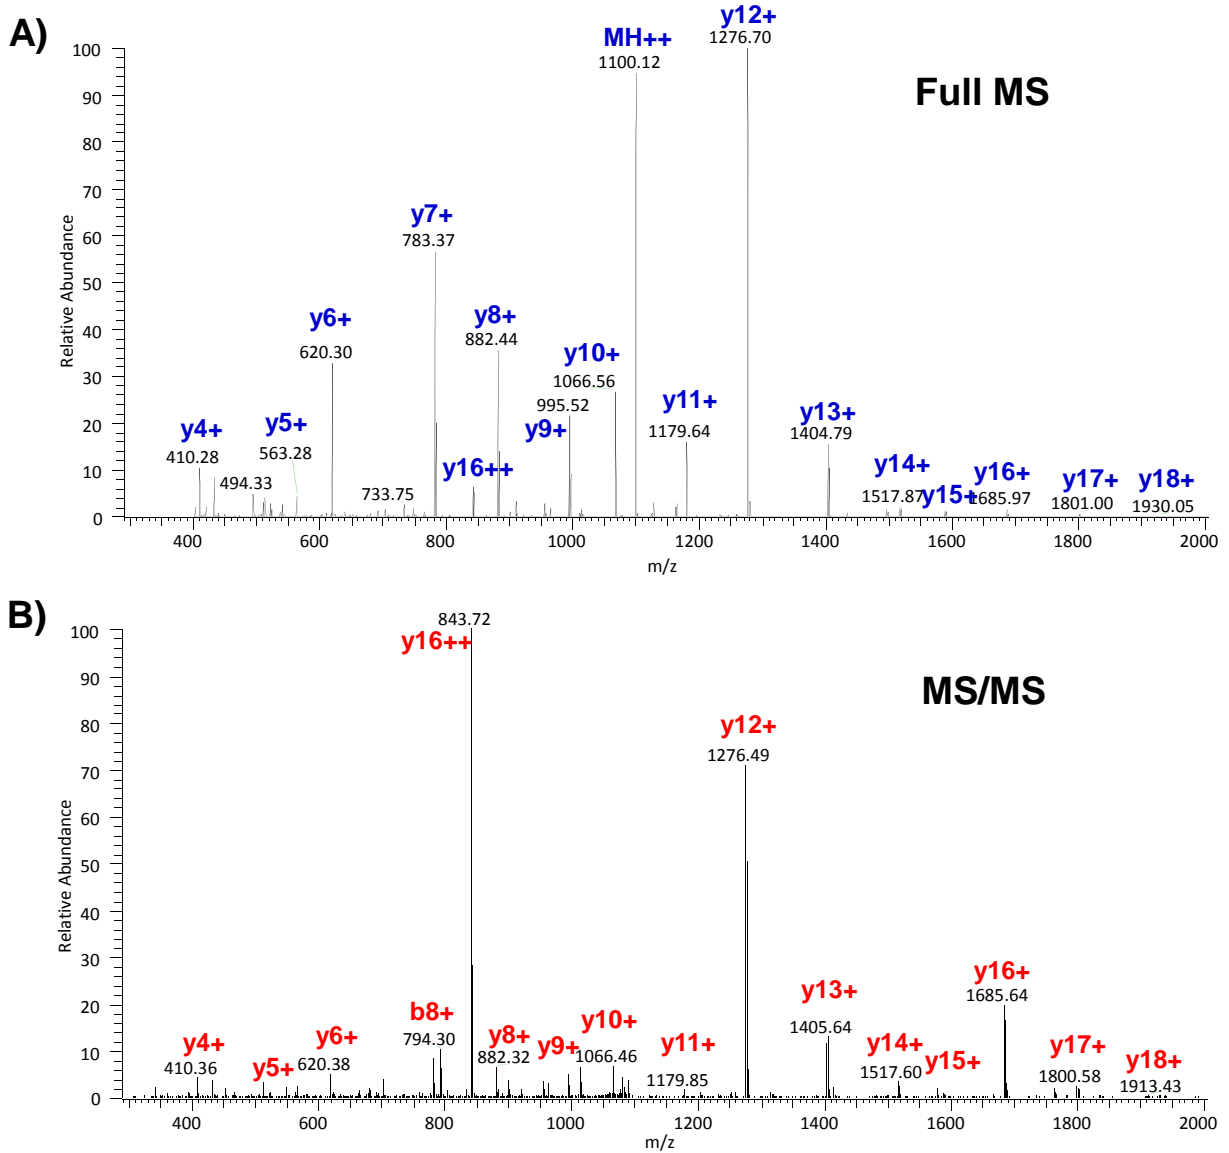

C)

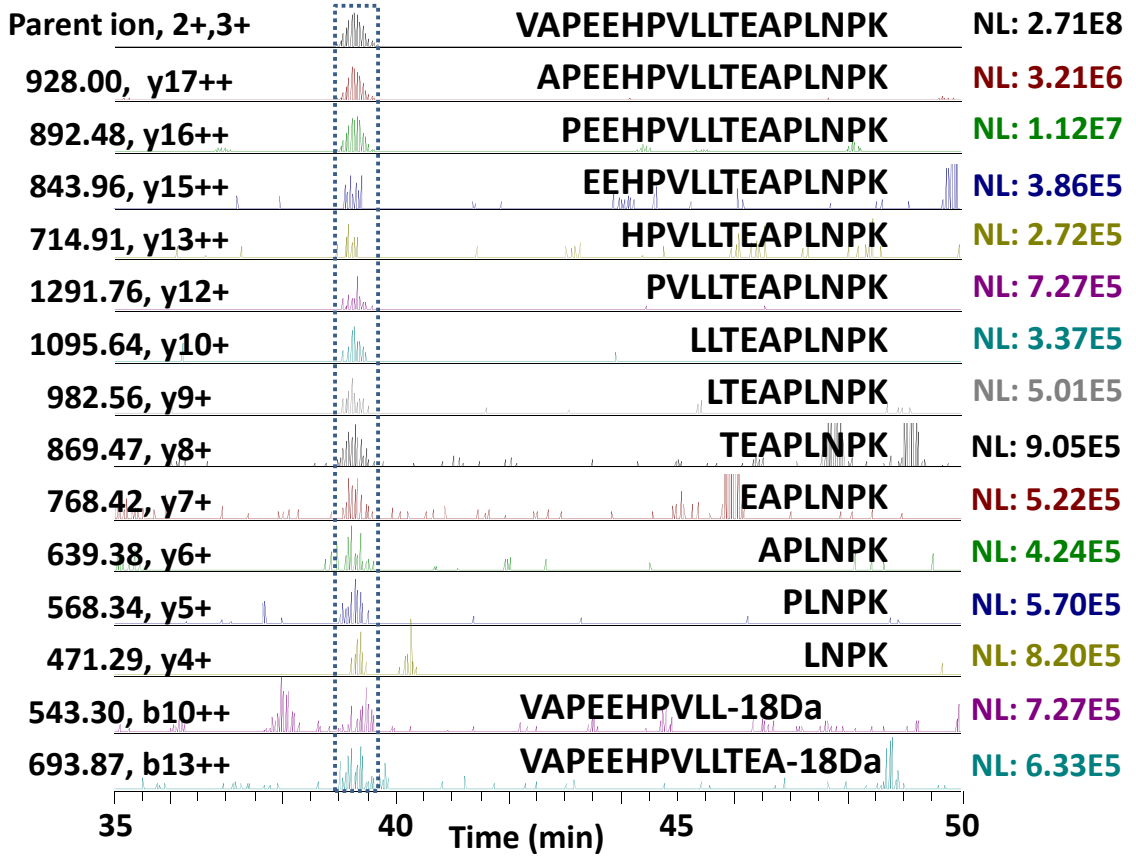

**Supplementary Figure 2.** B-ion type semitryptic peptides of trypsin itself (A) and their sequence motif from the peptides with more than two spectral counts (B).

**A)**

| Peptide                 | Reference | MH       | MSGF_Min  | Xcorr_Max | Spectral Count |
|-------------------------|-----------|----------|-----------|-----------|----------------|
| K.SSYPGQITGN.M          | TRYP_PIG  | 1023.474 | 8.503E-12 | 1.418     | 4              |
| K.IITHPNFNGN.T          | TRYP_PIG  | 1126.564 | 1.182E-11 | 2.215     | 2              |
| K.IITHPNFNGNTLD.N       | TRYP_PIG  | 1455.723 | 2.635E-12 | 3.321     | 1              |
| R.LGEHNIDVLEGNEQFIN.A   | TRYP_PIG  | 1940.935 | 1.637E-17 | 4.998     | 8              |
| R.LGEHNIDVLEGNEQFINA.A  | TRYP_PIG  | 2011.972 | 7.438E-14 | 4.826     | 3              |
| R.LGEHNIDVLEGNEQFINAA.K | TRYP_PIG  | 2083.009 | 1.800E-13 | 5.281     | 7              |

**B)**

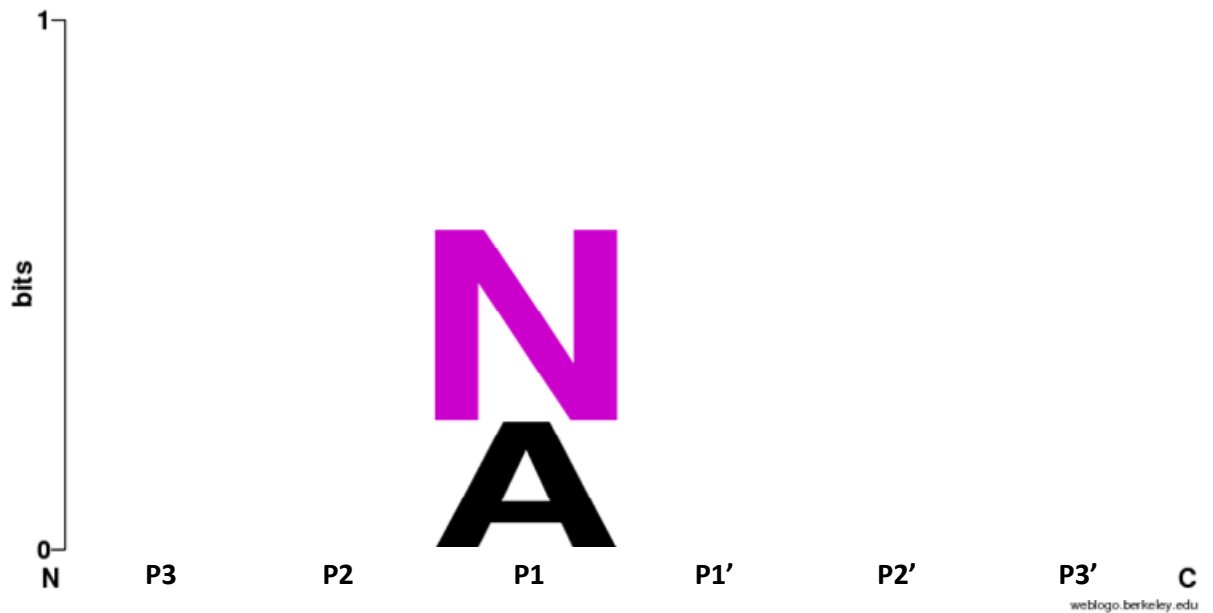

**Supplementary Figure 3.** Sequence motifs of [KR].P-cleaved semitryptic peptides (A) and [KR]P-containing, non-cleaved peptides (B).

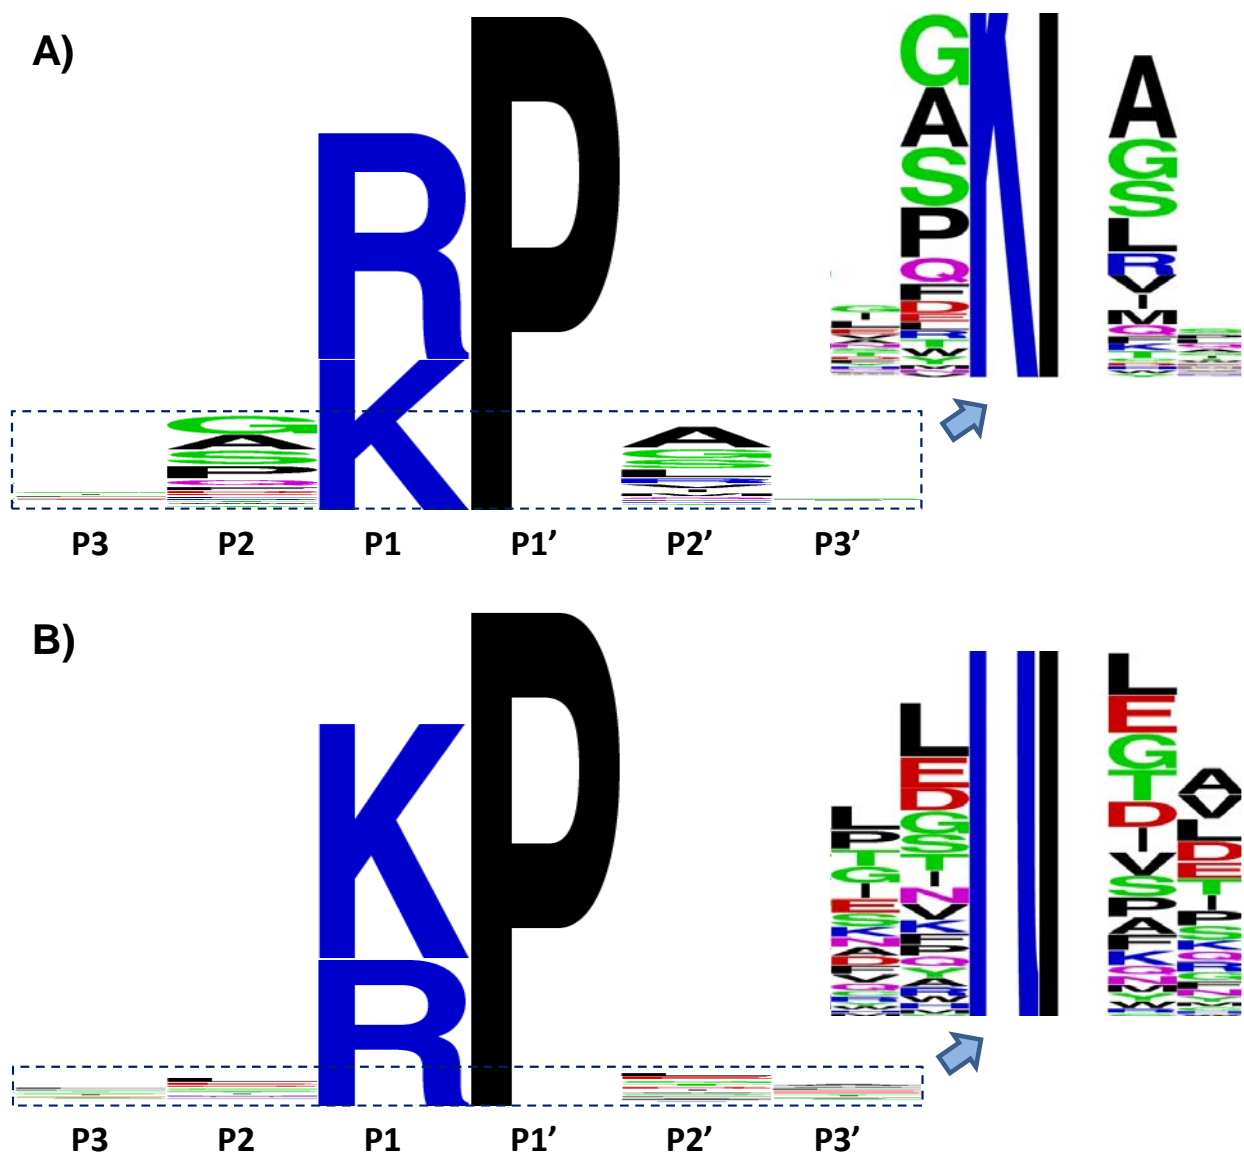

Supplement: NIHMS436931-supplement-1_si_001.pdf [file NIHMS436931-supplement-1_si_001.pdf]
